# The muscle dystrophy-causing $\Delta$ K32 lamin A/C mutant does not impair the functions of the nucleoplasmic lamin-A/C–LAP2 $\alpha$ complex in mice

Ursula Pilat<sup>1</sup>, Thomas Dechat<sup>1</sup>, Anne T. Bertrand<sup>2,3</sup>, Nikola Woisetschläger<sup>1</sup>, Ivana Gotic<sup>1</sup>, Rita Spilka<sup>1</sup>, Katarzyna Biadasiewicz<sup>1</sup>, Gisèle Bonne<sup>2,3,4</sup> and Roland Foisner<sup>1,\*</sup>

<sup>1</sup>Max F. Perutz Laboratories, Department of Medical Biochemistry, Medical University of Vienna, Dr. Bohr-Gasse 9, A-1030 Vienna, Austria

<sup>2</sup>Inserm, UMRS\_974, Paris, F-75013, France

<sup>3</sup>Université Pierre et Marie Curie-Paris 6, UM76, CNRS, UMR7215, Institut de Myologie, IFR14, Paris, F-75013, France

<sup>4</sup>AP-HP, Groupe Hospitalier Pitié-Salpêtrière, U.F. Cardiogénétique et Myogénétique, Service de Biochimie Métabolique, Paris, F-75013, France

\*Author for correspondence (roland.foisner@meduniwien.ac.at)

Accepted 26 January 2013

Journal of Cell Science 126, 1753–1762

© 2013. Published by The Company of Biologists Ltd

doi: 10.1242/jcs.115246

## Summary

A-type lamins are components of the nuclear lamina, a filamentous network of the nuclear envelope in metazoans that supports nuclear architecture. In addition, lamin A/C can also be found in the interior of the nucleus. This nucleoplasmic lamin pool is soluble in physiological buffer, depends on the presence of the lamin-binding protein, lamina-associated polypeptide 2 $\alpha$  (LAP2 $\alpha$ ) and regulates cell cycle progression in tissue progenitor cells.  $\Delta$ K32 mutations in A-type lamins cause severe congenital muscle disease in humans and a muscle maturation defect in *Lmna* <sup>$\Delta$ K32/ $\Delta$ K32</sup> knock-in mice. Mutant  $\Delta$ K32 lamin A/C protein levels were reduced and all mutant lamin A/C was soluble and mislocalized to the nucleoplasm. To test the role of LAP2 $\alpha$  in nucleoplasmic  $\Delta$ K32 lamin A/C regulation and functions, we deleted LAP2 $\alpha$  in *Lmna* <sup>$\Delta$ K32/ $\Delta$ K32</sup> knock-in mice. In double mutant mice the *Lmna* <sup>$\Delta$ K32/ $\Delta$ K32</sup>-linked muscle defect was unaffected. LAP2 $\alpha$  interacted with mutant lamin A/C, but unlike wild-type lamin A/C, the intranuclear localization of  $\Delta$ K32 lamin A/C was not affected by loss of LAP2 $\alpha$ . In contrast, loss of LAP2 $\alpha$  in *Lmna* <sup>$\Delta$ K32/ $\Delta$ K32</sup> mice impaired the regulation of tissue progenitor cells as in lamin A/C wild-type animals. These data indicate that a LAP2 $\alpha$ -independent assembly defect of  $\Delta$ K32 lamin A/C is the predominant cause of the mouse pathology, whereas the LAP2 $\alpha$ -linked functions of nucleoplasmic lamin A/C in the regulation of tissue progenitor cells are not affected in *Lmna* <sup>$\Delta$ K32/ $\Delta$ K32</sup> mice.

**Key words:** Congenital muscular dystrophy, Nuclear envelope, Lamin A/C, Lamina associated polypeptide 2 $\alpha$ , Nucleoplasmic lamins

## Introduction

Lamins are intermediate filament proteins in metazoan cells that form the lamina, a scaffold structure tightly associated with the inner nuclear membrane (Dechat et al., 2008). They provide mechanical stability for the nuclear envelope and the nucleus and help to organize higher-order chromatin structure. Lamins are grouped into A- and B-type, based on biochemical, structural and dynamic properties, sequence homologies and expression patterns. B-type lamins are ubiquitously expressed throughout development, but the major A-type lamins (lamin A and C) encoded by *LMNA* are expressed at later stages during development (Röber et al., 1989; Stewart and Burke, 1987). A- and B-type lamins undergo post-translational processing at their C-terminal CAAX motif, including farnesylation and carboxymethylation (Rusiñol and Sinensky, 2006). The hydrophobic farnesyl group at the C-terminal cysteine facilitates tight interaction with the inner nuclear membrane. Mature B-type lamins remain farnesylated, but lamin A undergoes an additional endoproteolytic processing step that removes 15 residues from the C-terminus including the farnesyl group (Pendás et al., 2002). Thus mature lamin A and also lamin C, which is not processed post-translationally, lack a farnesyl group and are less tightly bound to membranes than B-type lamins. Consequently, a

fraction of A-type lamins is also found in the nucleoplasm (Dechat et al., 2010).

The physiological relevance and functions of the nucleoplasmic lamin A/C pool are poorly understood, but they are probably involved in many of the reported functions of lamins in cell signaling and gene expression (Andrés and González, 2009; Dechat et al., 2010; Heessen and Fornerod, 2007; Prokocimer et al., 2009). Our recent studies showed that lamina-associated polypeptide 2 $\alpha$  (LAP2 $\alpha$ ) regulates the localization and functions of nucleoplasmic A-type lamins (Naetar et al., 2008). LAP2 $\alpha$  is a unique member of the LAP2 protein family (Wilson and Foisner, 2010). Although most LAP2 proteins are integral membrane proteins of the inner nuclear membrane and associate with lamins in the peripheral lamina, LAP2 $\alpha$  localizes to the interior of the nucleus and interacts with nucleoplasmic lamins A and C (Dechat et al., 2000). Deletion of LAP2 $\alpha$  in mice causes loss of lamins A and C in the nucleoplasm of dermal fibroblasts and proliferating tissue-progenitor cells, while lamins at the peripheral lamina are unaffected (Naetar et al., 2008). Similarly, human fibroblasts lose nucleoplasmic lamins following RNA-interference-mediated knockdown of LAP2 $\alpha$  (Pekovic et al., 2007). Moreover, during myoblast differentiation, LAP2 $\alpha$  expression is downregulated and nucleoplasmic lamins are lost (Markiewicz et al., 2005).

Nucleoplasmic lamins and LAP2 $\alpha$  were shown to bind directly to the tumor-suppressor retinoblastoma protein (pRb) in its active, hypo-phosphorylated form (Markiewicz et al., 2002) and to promote pRb repressor activity on pRb/E2F target gene promoters, mediating efficient cell cycle exit of proliferating cells (Dorner et al., 2006). Accordingly, LAP2 $\alpha$  deletion in mice accompanied by loss of nucleoplasmic lamins results in hyperproliferation of tissue progenitor cells and tissue hyperplasia (Naetar et al., 2008).

Mutations in the *LMNA* gene and in several genes encoding lamin-associated proteins have been linked to phenotypically heterogeneous diseases generally termed laminopathies. The disease variants range from muscular dystrophies over cardiomyopathies to lipodystrophies and systemic involvement of many tissues, such as in the premature ageing disease Hutchinson–Gilford progeria syndrome (HGPS) (Worman and Bonne, 2007). The molecular disease mechanisms underlying the laminopathies are still poorly understood. One disease model proposes defects in mechanical properties of the lamina in laminopathic cells, leading to increased fragility of nuclei, whereas other models have proposed impaired functions of mutated lamins in chromatin regulation and gene expression (Gotzmann and Foisner, 2006).

In a recent study we described a novel mouse model for a severe, striated muscle-affecting laminopathy (Bertrand et al., 2012): *Lmna* <sup>$\Delta$ K32/ $\Delta$ K32</sup> knock-in mice harbor a *Lmna* mutation that results in the loss of lysine 32 in the N-terminal domain of lamins A and C, and causes a severe form of congenital muscular dystrophy (CMD) in humans (Quijano-Roy et al., 2008). Homozygous *Lmna* <sup>$\Delta$ K32/ $\Delta$ K32</sup> mice were indistinguishable from their wild-type littermates at birth but soon exhibited striated muscle maturation delay and metabolic defects and died within 2–3 weeks (Bertrand et al., 2012). Interestingly, the  $\Delta$ K32 mutation was previously proposed to impair the lateral assembly of lamin A/C head to tail polymers (Bank et al., 2011). In line with this observation, mutant lamins failed to assemble at the lamina and localized predominantly in the nucleoplasm in *Lmna* <sup>$\Delta$ K32/ $\Delta$ K32</sup> mice. Taking into account our previous results on the important role of nucleoplasmic lamins in tissue progenitor cells (Dechat et al., 2010), we hypothesized that a deregulated nucleoplasmic lamin pool in *Lmna* <sup>$\Delta$ K32/ $\Delta$ K32</sup> mice might contribute to the pathologies. Therefore, we set out to test whether LAP2 $\alpha$ , a major regulator of nucleoplasmic lamins in *Lmna*<sup>+/+</sup> mice (Naetar et al., 2008), is also involved in regulating nucleoplasmic  $\Delta$ K32 lamin A/C, and whether and how loss of LAP2 $\alpha$  in *Lmna* <sup>$\Delta$ K32/ $\Delta$ K32</sup> mice might affect mutant lamin A/C localization and function. Using LAP2 $\alpha$ <sup>-/-</sup> and *Lmna* <sup>$\Delta$ K32/ $\Delta$ K32</sup> double mutant mice, we show in this manuscript that loss of LAP2 $\alpha$  does not change the localization of mutant lamins, as shown for wild-type lamins. LAP2 $\alpha$  and  $\Delta$ K32 lamin A/C, however, formed ‘functional’ complexes in the nucleoplasm, as loss of LAP2 $\alpha$  in *Lmna* <sup>$\Delta$ K32/ $\Delta$ K32</sup> mice caused hyperproliferation of epidermal progenitor cells and hyperplasia of the epidermis, a similar phenotype to *Lmna*<sup>+/+</sup> mice lacking LAP2 $\alpha$ . These data indicate that a LAP2 $\alpha$ -unrelated assembly defect of  $\Delta$ K32 lamin may be the predominant molecular defect in *Lmna* <sup>$\Delta$ K32/ $\Delta$ K32</sup> mice, while its LAP2 $\alpha$ -dependent functions in the nucleoplasm are unaffected.

## Results

### Loss of LAP2 $\alpha$ does not affect protein levels and localization of $\Delta$ K32 lamin A/C

Mutant  $\Delta$ K32 lamin A/C in *Lmna* <sup>$\Delta$ K32/ $\Delta$ K32</sup> knock-in mice fails to assemble at the nuclear lamina and mislocalizes to the

nucleoplasm (Bertrand et al., 2012). Because LAP2 $\alpha$  has previously been found to regulate the nucleoplasmic pool of wild-type lamins A and C (Naetar et al., 2008), we wanted to examine the influence of LAP2 $\alpha$  loss on  $\Delta$ K32 lamin A/C expression and cellular distribution. We generated double mutant mice by crossing *Lmna*<sup>+/ $\Delta$ K32</sup> mice with heterozygous *Lap2 $\alpha$* -deficient mice and isolated fibroblasts and myoblasts from newborn littermates. Lamin A/C protein levels were massively reduced to between 60 and 90% of wild-type lamin A/C levels in all *Lmna* <sup>$\Delta$ K32/ $\Delta$ K32</sup> cells independent of the presence or absence of LAP2 $\alpha$  (Fig. 1; supplementary material Fig. S1A). LAP2 $\alpha$  and other nuclear envelope and/or lamina proteins, such as lamin B1 and emerin, were not affected in *Lmna* <sup>$\Delta$ K32/ $\Delta$ K32</sup> cells. Similar results were obtained in lysates of liver and diaphragm derived from mice of the four genotypes (supplementary material Fig. S1B). Thus, LAP2 $\alpha$  loss did not affect the expression level of mutant  $\Delta$ K32 lamin A/C protein. Downregulation of mutant lamin A/C probably occurs post-transcriptionally, because lamin A mRNA levels in fibroblasts were similar in all genotypes (Fig. 1) in accordance with previous reports (Bertrand et al., 2012).

Immunofluorescence analyses of primary mouse fibroblasts confirmed the reduction of lamin A/C protein levels in single and double mutant *Lmna* <sup>$\Delta$ K32/ $\Delta$ K32</sup> mice. Co-cultures of LAP2 $\alpha$ -expressing and LAP2 $\alpha$ -deficient *Lmna*<sup>+/+</sup> and *Lmna* <sup>$\Delta$ K32/ $\Delta$ K32</sup> cells made it possible to identify *Lmna* <sup>$\Delta$ K32/ $\Delta$ K32</sup> versus *Lmna*<sup>+/+</sup> cells in the co-culture (by the lack of LAP2 $\alpha$  staining) and made it possible to compare lamin A/C levels and localization in the different genotypes under identical experimental conditions (Fig. 2A). Although wild-type lamin A/C was predominantly found peripherally in the nucleus with an additional weaker nucleoplasmic staining, the lowly expressed  $\Delta$ K32 lamin A/C mutant was equally distributed throughout the nucleoplasm without any clear nuclear rim staining. Quantitative analyses of lamin A/C localization by plotting lamin A/C staining intensity profiles across the nuclear diameter in confocal immunofluorescence images confirmed the uniform distribution of the  $\Delta$ K32 lamin A/C staining (Fig. 2B). LAP2 $\alpha$  localization was unaffected in  $\Delta$ K32 lamin A-expressing cells.

Although loss of LAP2 $\alpha$  in *Lmna*<sup>+/+</sup> cells decreases lamin A/C levels in the interior of the nucleus (Naetar et al., 2008), the exclusive nucleoplasmic localization of  $\Delta$ K32 lamin A/C mutant was unaffected by the absence of LAP2 $\alpha$ , as revealed in the staining intensity profiles (Fig. 2B). In addition, we calculated the ratios of nucleoplasmic over peripheral mean lamin A/C fluorescence intensities for 25–30 fibroblasts for each genotype (Fig. 2C). In *Lmna* <sup>$\Delta$ K32/ $\Delta$ K32</sup> fibroblasts, the ratios were significantly increased compared to *Lmna*<sup>+/+</sup> cells ( $n=25$ ,  $P<0.05$ ), reflecting the lack of accumulation of mutant lamin A/C at the periphery and its even distribution throughout the nucleus. Loss of LAP2 $\alpha$  had no effect on the distribution of mutant lamin A/C (*Lmna* <sup>$\Delta$ K32/ $\Delta$ K32</sup> background), whereas in the lamin A/C wild-type background loss of LAP2 $\alpha$  caused a significant reduction of nucleoplasmic lamins ( $n=30$ ,  $P<0.05$ ).

Our data suggest that  $\Delta$ K32 lamin A/C has a LAP2 $\alpha$ -independent assembly defect, preventing it from assembling at the nuclear lamina, which is in line with previous reports in *C. elegans* (Bank et al., 2011). To test this hypothesis, we performed cell lysis in physiological buffer plus 0.5% Triton X-100/0.1% SDS and determined the soluble, unassembled pool of lamin A/C by immunoblotting and densitometric analyses. Although only

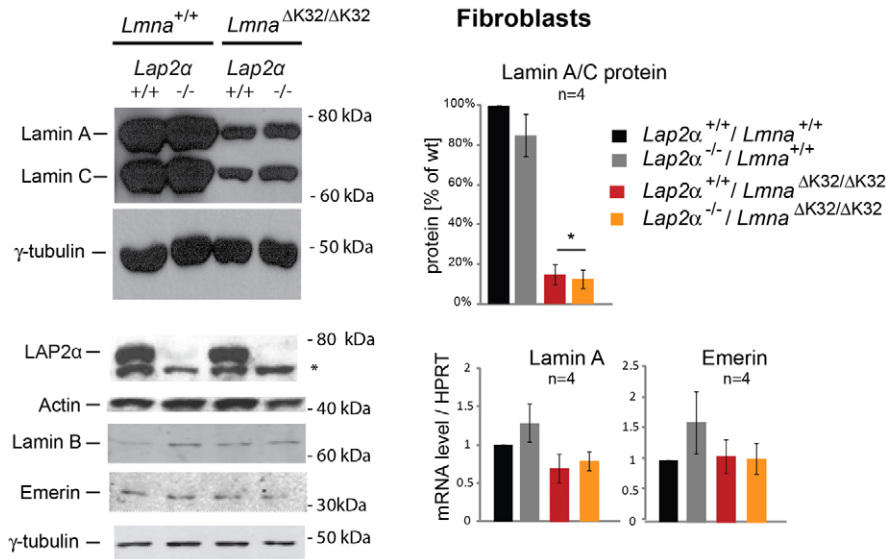

**Fig. 1. Lamin A/C expression is significantly reduced in ΔK32 Lamin-A/C-expressing cells independently of the presence and absence of LAP2α.** Left: immunoblots of lysates of primary fibroblasts derived from single and double mutant *Lmna*<sup>ΔK32/ΔK32</sup> and *Lap2α*<sup>-/-</sup> mice and wild-type control littermates, probed for the indicated proteins. The asterisk indicates an unspecific band produced by the LAP2α antibody. For quantification of lamin protein levels, band intensities of lamins A and C were combined and normalized to the band intensity of the actin loading control and presented as the percentage of the wild-type control (right). Protein levels of single mutant *Lmna*<sup>ΔK32/ΔK32</sup> and double mutant *Lmna*<sup>ΔK32/ΔK32</sup>/*Lap2α*<sup>-/-</sup> fibroblasts were significantly reduced (*n*=4, *P*=0.04 and 0.03, respectively, as determined by Student's *t*-test against the wild type). Lower right: mRNA levels of lamin A and emerlin as determined by real-time PCR. mRNA levels were normalized to the corresponding wild-type levels. Means and s.e.m. of three or four independent experiments are shown. mRNA levels of lamin A or emerlin are not different in single and double mutant fibroblasts from those in the wild type as determined by Student's *t*-test: *Lmna*<sup>ΔK32/ΔK32</sup>; *n*=4, *P*=0.2 (lamin A) and 0.8 (emerlin); *Lap2α*<sup>-/-</sup>; *n*=4, *P*=0.4 (lamin) and 0.3 (emerlin); *Lmna*<sup>ΔK32/ΔK32</sup>/*Lap2α*<sup>-/-</sup>; *n*=4, *P*=0.2 (lamin) and 0.9 (emerlin). (In this and subsequent figures, \* indicates *P*<0.05, and \*\*\* indicates *P*<0.01.)

approximately 10% of total wild-type lamin A/C was soluble, all of the ΔK32 lamin A/C was solubilized under these conditions (Fig. 2D).

**ΔK32 lamin A interacts with LAP2α similarly to wild-type lamin A**

Next we tested whether the mutated ΔK32 lamin A is able to directly interact with LAP2α. Bacterially expressed ΔK32 and wild-type pre-lamin A were transferred to nitrocellulose and probed with *in vitro* translated <sup>35</sup>S-labeled LAP2α. Autoradiography of the blot revealed binding of LAP2α to both wild-type and ΔK32 lamin A, whereas binding to a related, cytoplasmic intermediate filament protein, vimentin was not detectable (Fig. 3). To test whether ΔK32 lamin-A–LAP2α complexes also exist *in vivo* we lysed ΔK32 lamin-A-expressing cells in physiological buffer containing 0.5% Triton X-100/0.1% SDS, and immunoprecipitated ΔK32 lamin A using specific antibodies. Unlike in mock precipitations using empty beads, LAP2α was co-precipitated with ΔK32 lamin A (Fig. 3C).

**The lethal postnatal phenotype of *Lmna*<sup>ΔK32/ΔK32</sup> mice is not affected by loss of LAP2α**

In order to test the effect of loss of LAP2α on the organismal and tissue phenotype of *Lmna*<sup>ΔK32/ΔK32</sup> mice, we analyzed litters of mice heterozygous for both LAP2α and ΔK32 lamin A/C (*Lap2α*<sup>+/-</sup>/*Lmna*<sup>+/ΔK32</sup>). The breeding produced genotypes according to Mendelian ratios (*n*=384; *Lmna*<sup>+/+</sup>/*Lap2α*<sup>+/+</sup>=4.7%; *Lmna*<sup>+/+</sup>/*Lap2α*<sup>-/-</sup>=7.5%; *Lmna*<sup>ΔK32/ΔK32</sup>/*Lap2α*<sup>+/+</sup>=4.9%; *Lmna*<sup>ΔK32/ΔK32</sup>/*Lap2α*<sup>-/-</sup>=8.4%). All genotypes were indistinguishable from wild-type littermates at birth. From

postnatal day 6 on, all mutant mice homozygous for *Lmna*<sup>ΔK32/ΔK32</sup>, independent of the *Lap2α* genotype, were smaller with a kinked tail, and showed progressive growth retardation and stagnation in weight gain, as well as atrophied muscles and reduced mobility. By post-natal day 15 for single *Lmna*<sup>ΔK32/ΔK32</sup> mutants, and day 17 for double *Lmna*<sup>ΔK32/ΔK32</sup>/*Lap2α*<sup>-/-</sup> mutants, only 50% of mice were alive, and none survived longer than post-natal day 21 (supplementary material Fig. S2). Thus, double mutants for *Lmna*<sup>ΔK32/ΔK32</sup> and *Lap2α*<sup>-/-</sup> showed a slightly prolonged, though statistically insignificant survival in comparison to the single *Lmna*<sup>ΔK32/ΔK32</sup> littermates, indicating that the *Lmna*<sup>ΔK32/ΔK32</sup>-linked phenotype was prominent.

**LAP2α<sup>-/-</sup>-specific epidermal paw hyperplasia is not reduced by ΔK32 lamin A/C**

Having shown that ΔK32 lamin A/C fails to form a lamina at the periphery of the nucleus, but was still able to interact with LAP2α in the nucleoplasm, we sought to test whether ΔK32 lamin-A–LAP2α complexes can still function in tissue progenitor cell regulation. Loss of nucleoplasmic lamin-A/C–LAP2α complexes by either deletion of *Lap2α* or deletion of *Lmna* (causing loss of nucleoplasmic and peripheral lamina) was shown to cause hyperproliferation of epidermal progenitor cells and progressive hyperplasia of the paw epidermis during post-natal life (Naetar et al., 2008). If the nucleoplasmic ΔK32 lamin-A/C–LAP2α complex is still functional in this pathway, LAP2α knockdown in *Lmna*<sup>ΔK32/ΔK32</sup> mice is expected to have a similar effect on epidermal progenitor cells and epidermal thickness as in wild-type mice. Despite the young age of *Lmna*<sup>ΔK32/ΔK32</sup> single and



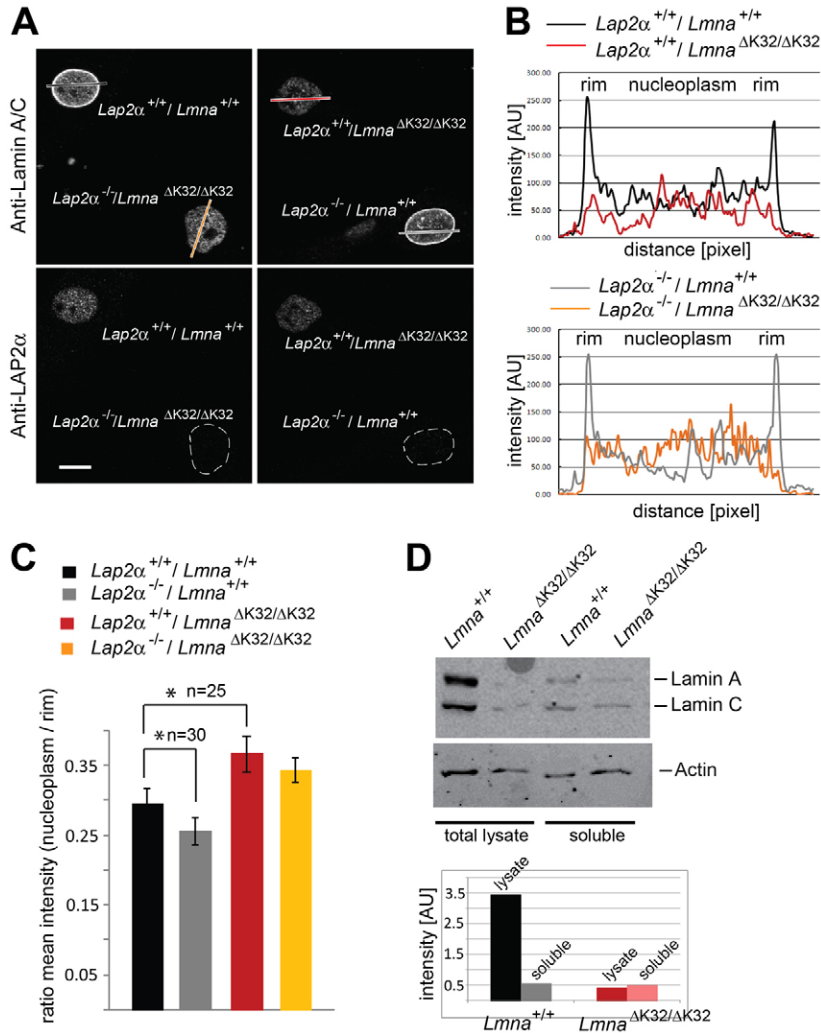

**Fig. 2. Lamin A/C protein is redistributed to the interior of the nucleus in *Lmna*<sup>ΔK32/ΔK32</sup> fibroblasts in a LAP2α-independent manner.** (A) Co-cultured primary dermal fibroblasts isolated from new-born littermates of the indicated genotypes, were examined by confocal immunofluorescence microscopy. Cells were stained with antibodies to lamin A/C and LAP2α, with the latter allowing identification of the genotype in mixed cultures. Scale bar: 10 μm. (B) Quantification of intranuclear lamin staining using fluorescence intensity measurements along the colored lines in A, using the profile tool in Zeiss LSM Image Browser. (C) Ratios of nucleoplasmic over peripheral mean A-type lamin fluorescence intensity. The ratios are significantly higher in *Lmna*<sup>ΔK32/ΔK32</sup> fibroblasts, than in wild-type controls ( $n=25$ ,  $P<0.05$ ). In the *Lmna*<sup>+/+</sup> background, nucleoplasmic lamins are lost and the ratio decreases significantly upon loss of LAP2α ( $n=30$ ,  $P<0.05$ ). (D) Immunoblots of total cell lysates and of soluble cell fractions following lysis of cells in Hapes buffer plus 0.5% Triton X-100 and 0.1% SDS, probed for lamin A/C and actin. Protein bands were quantified using ImageJ.

double mutant mice, the paw epidermis was ~20% thicker in *Lmna*<sup>ΔK32/ΔK32</sup>/*Lap2α*<sup>-/-</sup> versus *Lmna*<sup>ΔK32/ΔK32</sup>/*Lap2α*<sup>+/+</sup> littermates (Fig. 4A). Moreover, and in line with our previous findings, a higher number of proliferating (KI67-positive) cells was detected in double mutant *Lmna*<sup>ΔK32/ΔK32</sup>/*Lap2α*<sup>-/-</sup> versus *Lmna*<sup>ΔK32/ΔK32</sup>/*Lap2α*<sup>+/+</sup> mice (Fig. 4B), pointing to an increased proliferation of epidermal progenitor cells. Thus, we concluded that the ΔK32 lamin A/C mutant is still active in regulating progenitor cells in conjunction with LAP2α.

#### Loss of LAP2α in *Lmna*<sup>ΔK32/ΔK32</sup> mice increased the number of skeletal muscle progenitor cells

LAP2α loss was previously also shown to increase the number of skeletal muscle progenitor cells (Gotic et al., 2010). To test the number of satellite cells in *Lmna*<sup>ΔK32/ΔK32</sup> mice, we enriched skeletal muscle progenitor cells (SMPC) from an isolated pool of muscle-fiber-associated cells by flow cytometry, based on the expression of CXCR4 and β1-integrin and lack of expression of CD45, Sca1 or Mac1. Immunofluorescence microscopy of these cells confirmed mislocalization of ΔK32 lamin A/C and unaltered lamin B distribution in lamin mutant versus wild-type cells (Fig. 5). Importantly, in both *Lmna*<sup>+/+</sup> and *Lmna*<sup>ΔK32/ΔK32</sup> mice the SMPC population was increased in *Lap2α*<sup>-/-</sup> versus *Lap2α*<sup>+/+</sup> background (Fig. 5), supporting the hypothesis that

ΔK32 lamin A/C, in conjunction with LAP2α, is equally capable of regulating muscle progenitor cells as the wild-type lamin A/C. The increase in SMCP cells in LAP2α-deficient versus LAP2α-expressing *Lmna*<sup>ΔK32/ΔK32</sup> mice might slightly improve growth capability of muscle, which may also contribute to the subtle increase in survival of *Lmna*<sup>ΔK32/ΔK32</sup>/*Lap2α*<sup>-/-</sup> versus *Lmna*<sup>ΔK32/ΔK32</sup>/*Lap2α*<sup>+/+</sup> mice (see supplementary material Fig. S2).

Based on the reported muscle phenotype of *Lmna*<sup>ΔK32/ΔK32</sup> mice (Bertrand et al., 2012) we also compared SMPC cell numbers in *Lmna*<sup>ΔK32/ΔK32</sup> versus *Lmna*<sup>+/+</sup> littermates. The number of muscle-fiber-associated SMPC cells was indistinguishable in these genotypes (Fig. 5), indicating that an exhaustion of the SMPC pool is unlikely to contribute to muscle disease in *Lmna*<sup>ΔK32/ΔK32</sup> mice.

#### Muscular atrophy in *Lmna*<sup>ΔK32/ΔK32</sup> mice is not affected by loss of LAP2α

Histological Hematoxylin and Eosin staining of gastrocnemius and soleus muscle sections of 16-day-old *Lmna*<sup>ΔK32/ΔK32</sup> mice revealed a generally atrophied muscle, decreased fiber cross-sectional area, variability in fiber size and a significantly increased proportion of muscle fibers with centrally located or internalized nuclei (Fig. 6). Other dystrophic changes, such as

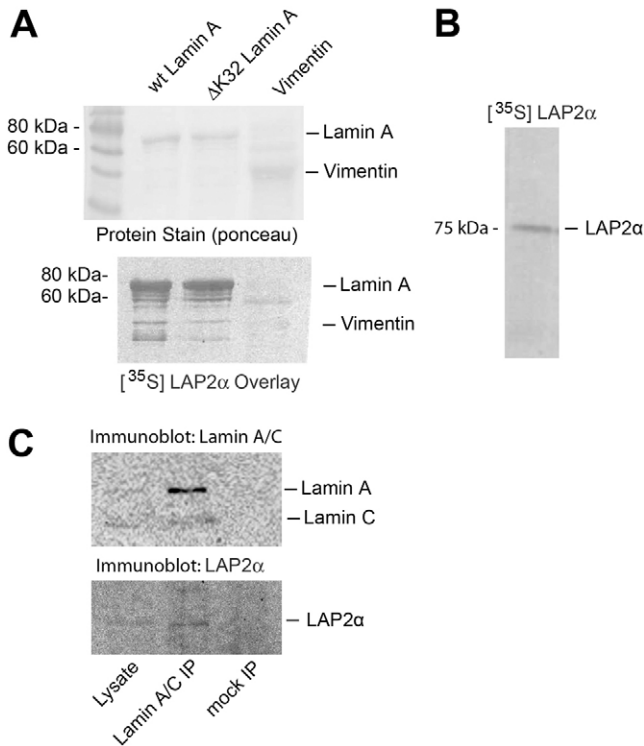

**Fig. 3. Wild-type and ΔK32 lamin A bind LAP2α *in vitro* and *in vivo*.** (A) PonceauS staining of bacterially expressed and blotted recombinant wild-type prelamins A, ΔK32-prelamins A and vimentin on nitrocellulose, and autoradiogram of the same blot after probing with <sup>35</sup>S-labelled LAP2α. (B) Autoradiography of *in vitro*-translated <sup>35</sup>S-labelled LAP2α separated by SDS-PAGE. (C) Immunoblots of total cell lysates of ΔK32-lamin A/C fibroblasts (5% of input) and immunoprecipitates obtained with lamin A/C antibodies or empty beads (mock).

replacement of functional muscle fibers with connective tissue or fat, cellular infiltrates, increased endomysial space, ruptured fibers or an increase in serum levels of creatine kinase (CK) levels as reported by Costanza and Moggio were not observed (Costanza and Moggio, 2010). This phenotype was predominantly caused by the lamin A/C mutant, as the presence or absence of LAP2α did not grossly affect this phenotype. However, one striking phenotype upon loss of LAP2α in *Lmna*<sup>ΔK32/ΔK32</sup> mice was the further increase in the number of fibers with centrally located nuclei (from 14.2% to 18.4%, *n*=7, *P*=0.019; Fig. 6C). This observation is consistent with a subtle increase in muscle growth in the LAP2α-deficient background probably due to the higher number of SMPCs (Fig. 5). The presence of a central nucleus within muscle fibers may also be an indicator of a muscle maturation defect as reported (Bertrand et al., 2012). Indeed, the proportion of muscle fibers expressing the embryonic form of myosin heavy chain was significantly increased in *Lmna*<sup>ΔK32/ΔK32</sup> versus *Lmna*<sup>+/+</sup> mice (Fig. 6D; *n*=4, *P*=0.04), but was independent of LAP2α expression.

***In vitro* differentiation of *Lmna*<sup>ΔK32/ΔK32</sup> myoblasts is massively delayed and insufficient**

When *Lmna*<sup>ΔK32/ΔK32</sup> myoblasts were cultivated *in vitro* and induced to differentiate by withdrawal of serum, we observed a delayed onset of differentiation, an reduced formation of

myotubes and failure to upregulate myosin heavy chain compared to the wild-type littermates, pointing to an impairment of the differentiation potential of *Lmna*<sup>ΔK32/ΔK32</sup> myoblasts. Additional loss of LAP2α did not noticeably aggravate or ameliorate this phenotype. Fig. 7A shows a lag of *Lmna*<sup>ΔK32/ΔK32</sup> myoblast differentiation at day 3, irrespective of LAP2α expression and a massive reduction of myotube formation at day 6 of *in vitro* muscle differentiation, as confirmed also by immunofluorescence microscopy of myotubes at day 4 of differentiation (Fig. 7C). In line with this, qRT-PCR analyses revealed a failure of myosin heavy chain upregulation during differentiation (Fig. 7B).

**Discussion**

In this manuscript we confirm and extend our previous findings showing that CMD-linked ΔK32 lamin A/C mutants fail to accumulate at the nuclear lamina in primary fibroblasts of *Lmna*<sup>ΔK32/ΔK32</sup> knock-in mice. Mutant lamin A/C protein is significantly reduced and localizes uniformly throughout the entire nucleus. Also in wild-type cells and tissues, a highly dynamic and cell-cycle-dependent pool of lamin A/C has been described in the interior of the nucleus (Moir et al., 2000; Naetar et al., 2008). This nucleoplasmic pool of lamin A/C has been found to associate with LAP2α and has been implicated in the regulation of proliferation and differentiation of tissue progenitor cells during tissue homeostasis (Naetar et al., 2008). It was thus tempting to speculate that an abnormally regulated pool of nucleoplasmic lamins or a misbalance between lamina-associated and lamina-independent lamins were responsible for some of the pathologies described in the *Lmna*<sup>ΔK32/ΔK32</sup> mice (Bertrand et al., 2012). To test this hypothesis we investigated whether any of the previously described functions and regulation mechanisms of nucleoplasmic lamin–LAP2α complexes are impaired in ΔK32 lamin A/C knock-in mice.

Although the regulation of the intranuclear, nucleoplasmic lamin A/C pool is not completely understood yet, our previous studies revealed one direct regulator of nucleoplasmic lamins A and C, a nucleoplasmic isoform of the lamina-associated polypeptide 2 family, termed LAP2α. Although most other LAP2 isoforms are transmembrane proteins of the inner nuclear membrane and bind lamins in the nuclear lamina (Foisner and Gerace, 1993), LAP2α lacks a transmembrane domain and localizes to the interior of the nucleus (Dechat et al., 1998) and specifically binds A-type lamins (Dechat et al., 2000). We showed that loss of LAP2α in LAP2α knockout mice reduced the levels of lamins A and C in the interior of the nucleus in proliferating epidermal progenitor cells and primary fibroblasts, and that re-expression of LAP2α in LAP2α-deficient fibroblasts rescued the nucleoplasmic lamin A/C pool (Naetar et al., 2008). These data suggested that LAP2α is essential and sufficient for targeting and/or stabilizing nucleoplasmic lamins A and C. Since this activity of LAP2α required its C-terminal lamin-A/C-interaction domain, it was assumed that LAP2α regulates intranuclear lamin A/C by direct binding. Because we found here that LAP2α also interacted with mutant ΔK32 lamin A/C, we reasoned that loss of LAP2α in *Lmna*<sup>ΔK32/ΔK32</sup> mice might reduce the potentially abnormal nucleoplasmic ΔK32 lamin A/C pool in mutant mice and might allow mutant lamin to associate with the peripheral lamina. However, loss of LAP2α did not affect either the levels or localization of ΔK32 lamin A/C. Therefore, we concluded that mutant lamin A/C is incapable of

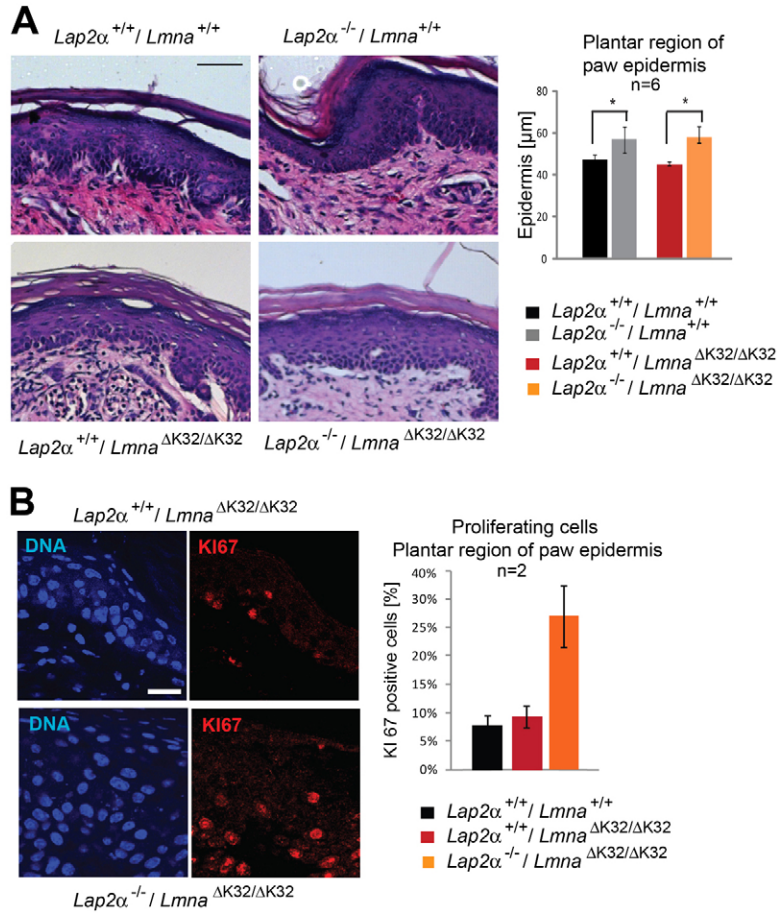

**Fig. 4.** *Lap2α*<sup>-/-</sup>-specific epidermal paw hyperplasia is not affected in *Lmna*<sup>ΔK32/ΔK32</sup> mice. (A) Paraffin-embedded paw sections of 18-day-old single and double mutant *Lmna*<sup>ΔK32/ΔK32</sup> and *Lap2α*<sup>-/-</sup> mice and respective wild-type control littermates were stained with Hematoxylin and Eosin. Scale bar: 50 μm. The thickness of the epidermis in the plantar region of the paw is shown on the right. Upon loss of LAP2α, the thickness of the epidermis is increased irrespective of *Lmna*<sup>ΔK32/ΔK32</sup> (*n*=6, *P*<0.05). (B) Paraffin-embedded paw sections were processed for immunofluorescence microscopy and stained for the proliferation marker KI67. Scale bar: 20 μm. KI67-positive nuclei, were counted (right) and found to be increased upon loss of LAP2α (*n*=2).

assembling at the nuclear lamina even in the absence of LAP2α, supporting previous studies that suggested that the ΔK32 mutation in lamin A/C impairs the lateral association of head-to-tail dimer protofilaments into anti-parallel tetrameric filaments (Bank et al., 2011). These studies, which were performed in *C. elegans* did not, however, reveal a uniform nucleoplasmic distribution of mutant lamin but rather nucleoplasmic aggregates. This difference may be due to the fact that *C. elegans* has only one lamin gene, which encodes a farnesylated B-type lamin. In any case, our studies reveal that

mouse ΔK32 lamin A shows a LAP2α-independent assembly defect.

Our binding analyses show that LAP2α and ΔK32 lamin A/C can form complexes in the nucleus. Are these complexes functional? Lamins A and C at the nuclear lamina have been implicated in a number of functions, including nuclear architecture (Sullivan et al., 1999), (hetero-)chromatin organization (Guelen et al., 2008) and signaling (reviewed by Andrés and Gonzalez, 2009; Heessen and Fornerod, 2007). We have previously shown that LAP2α and nucleoplasmic lamin A/C

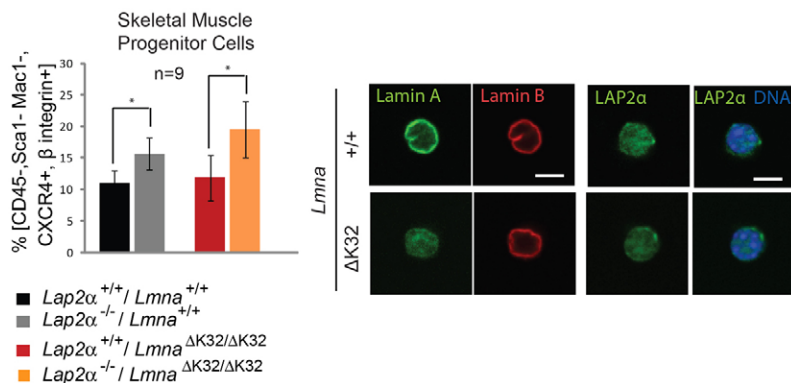

**Fig. 5.** *Lap2α*<sup>-/-</sup>-specific increase in SMPCs is not affected in *Lmna*<sup>ΔK32/ΔK32</sup> mice. SMPCs (CD45<sup>-</sup>/Sca1<sup>-</sup>/Mac1<sup>-</sup>/CXCR4<sup>+</sup>/β1-integrin<sup>+</sup>) were obtained from skeletal muscles (gastrocnemius, soleus, tibialis anterior, quadriceps, triceps) and analyzed by flow cytometry or processed for confocal immunofluorescence microscopy. (Left) The number of CD45<sup>-</sup>/Sca1<sup>-</sup>/Mac1<sup>-</sup>/CXCR4<sup>+</sup>/β1-integrin<sup>+</sup> (SMPC) cells within the parent population (CD45<sup>-</sup>/Sca1<sup>-</sup>/Mac1<sup>-</sup>) is shown. *Lap2α*<sup>-/-</sup> mice show a significant increase in SMPCs in comparison to their wild-type littermates (*n*=9, *P*=0.03, Student's *t*-test). Similarly double mutant *Lmna*<sup>ΔK32/ΔK32</sup>/*Lap2α*<sup>-/-</sup> mice have more SMPCs in comparison to their single mutant *Lmna*<sup>ΔK32/ΔK32</sup> littermates (*n*=9, *P*=0.02 as determined by Student's *t*-test). (Right) Immunofluorescence confocal images of isolated SMPCs stained for lamin A/C, lamin B and LAP2α. Scale bar: 5 μm.



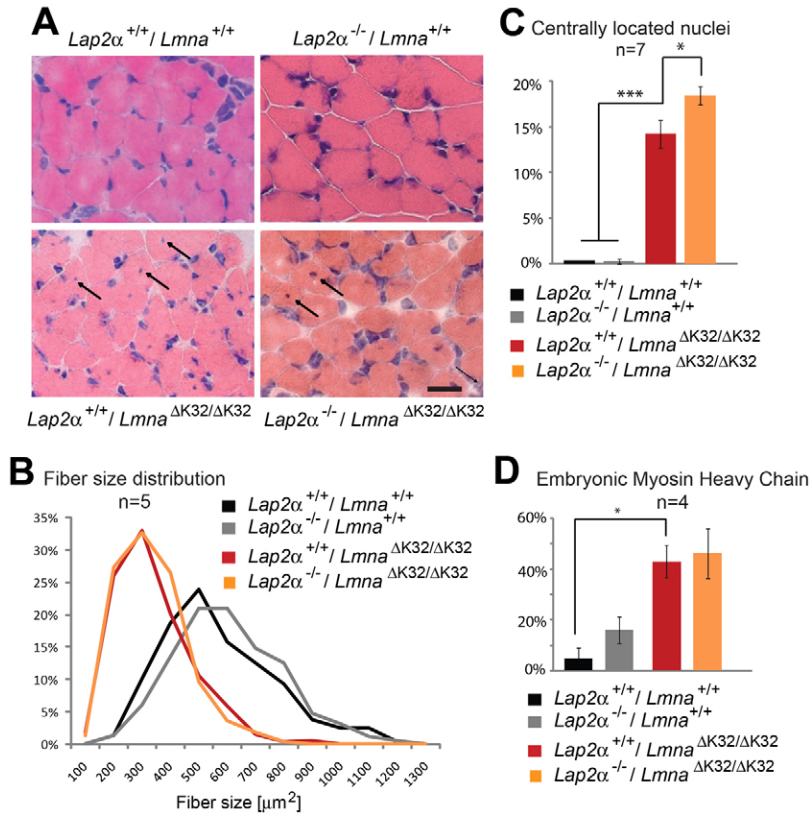

**Fig. 6. Skeletal muscle phenotype of double mutant *Lmna*<sup>ΔK32/ΔK32</sup>/*Lap2α*<sup>-/-</sup> mice.** (A) Cross sections of cryo-preserved gastrocnemius muscles of 18-day-old wild-type and single and double mutant *Lmna*<sup>ΔK32/ΔK32</sup> *Lap2α*<sup>-/-</sup> mice were stained with Hematoxylin and Eosin. Arrows denote fibers with a central nucleus. Scale bar: 50 μm. (B) Fiber cross-sectional area (n=5) of each genotype was measured. (C) Quantification of fibers with a centrally located nucleus (n=7,  $P=9.9 \times 10^{-5}$  for *Lmna*<sup>+/+</sup> against *Lmna*<sup>ΔK32/ΔK32</sup>/*Lap2α*<sup>+/+</sup> and  $P=0.019$  for *Lmna*<sup>ΔK32/ΔK32</sup>/*Lap2α*<sup>+/+</sup> against *Lmna*<sup>ΔK32/ΔK32</sup>/*Lap2α*<sup>-/-</sup>). (D) Quantification of muscle fibers positive for embryonic myosin heavy chain (n=4,  $*P=0.04$  for *Lmna*<sup>+/+</sup> against *Lmna*<sup>ΔK32/ΔK32</sup>/*Lap2α*<sup>+/+</sup>).

also function in the regulation of the pRb pathway (Dorner et al., 2006; Naetar et al., 2008). This function, which is likely to be independent of the peripheral lamina, has been proposed to regulate the proliferation and differentiation of tissue progenitor cells during tissue homeostasis. Since classical gene knockout or knock-in approaches in mouse by targeting the *Lmna* gene affect both the peripheral lamina and the nucleoplasmic lamin A/C pool, it has been difficult to distinguish and specifically test the activities of peripheral versus nucleoplasmic lamins. The LAP2α knockout mouse is currently the only model that selectively affects the nucleoplasmic pool of lamin A/C, while the peripheral lamina remains unaffected (Naetar et al., 2008). The fact that both the selective loss of nucleoplasmic lamins (by LAP2α deletion) and the complete loss of lamin A/C in *Lmna*<sup>-/-</sup> mice (affecting nucleoplasmic and peripheral lamins) show a similar hyperproliferation of progenitor cells in the paw epidermis and epidermal hyperplasia (Naetar et al., 2008) indicates that the phenotype is directly linked to the loss of nucleoplasmic lamin–LAP2α complexes rather than the loss of lamin-independent functions of LAP2α. If the nucleoplasmic ΔK32 lamin A/C–LAP2α complexes were still functional, we would expect similar consequences on tissue progenitor cells upon LAP2α loss in wild-type and *Lmna*<sup>ΔK32/ΔK32</sup> mice. Indeed, we observed an increase in proliferating cells in paw epidermis and a thickening of the epidermis upon knocking out LAP2α in *Lmna*<sup>ΔK32/ΔK32</sup> mice. These data show, (1) that nucleoplasmic ΔK32 lamin A/C still functions in the regulation of tissue progenitor cells, and (2) that the nucleoplasmic lamins require LAP2α for this activity. Forcing lamin A/C into the interior by,

for instance interfering with their assembly at the lamina (as occurs in *Lmna*<sup>ΔK32/ΔK32</sup> mice) is insufficient to generate ‘active’ nucleoplasmic lamin complexes.

Based on our results, it is likely that the pathologies described in the *Lmna*<sup>ΔK32/ΔK32</sup> mice are primarily caused by loss of peripheral lamins and/or the downregulation of lamin protein levels. Can loss of LAP2α affect the mutant lamin A/C-linked phenotype? One of the most prominent phenotype described in the *Lmna*<sup>ΔK32/ΔK32</sup> mice is an impaired peri- and postnatal muscle maturation, reflected in an increased number of muscle fibers with centrally located nuclei and increased embryonic myosin heavy chain expression. Since LAP2α loss has been shown to increase the number of fiber-associated progenitor cells, we speculated that the larger pool of skeletal muscle progenitor cells might partially rescue the mutant lamin A/C-mediated muscle defect. Although we saw a LAP2α loss-mediated increase in muscle progenitor cells in *Lmna*<sup>ΔK32/ΔK32</sup> mice, which might theoretically contribute to regeneration of defective muscle, we did not see any significant rescue of muscle morphology and maturation in double mutant *Lmna*<sup>ΔK32/ΔK32</sup>/*Lap2α*<sup>-/-</sup> versus *Lmna*<sup>ΔK32/ΔK32</sup> mice. The slight increase in muscle fibers with centrally located nuclei in muscle of *Lmna*<sup>ΔK32/ΔK32</sup>/*Lap2α*<sup>-/-</sup> versus *Lmna*<sup>ΔK32/ΔK32</sup> mice would be consistent with an increased regeneration/growth activity. However, the prominent lamin mutant-linked defect in myoblast differentiation *in vitro* may preclude any further improvement of the double mutant phenotype.

Overall, our studies show that a LAP2α-independent defect of the assembly and stability of ΔK32 lamin A/C and the accompanying loss of lamin A/C at the peripheral lamina are prominent in *Lmna*<sup>ΔK32/ΔK32</sup> mice and responsible for the

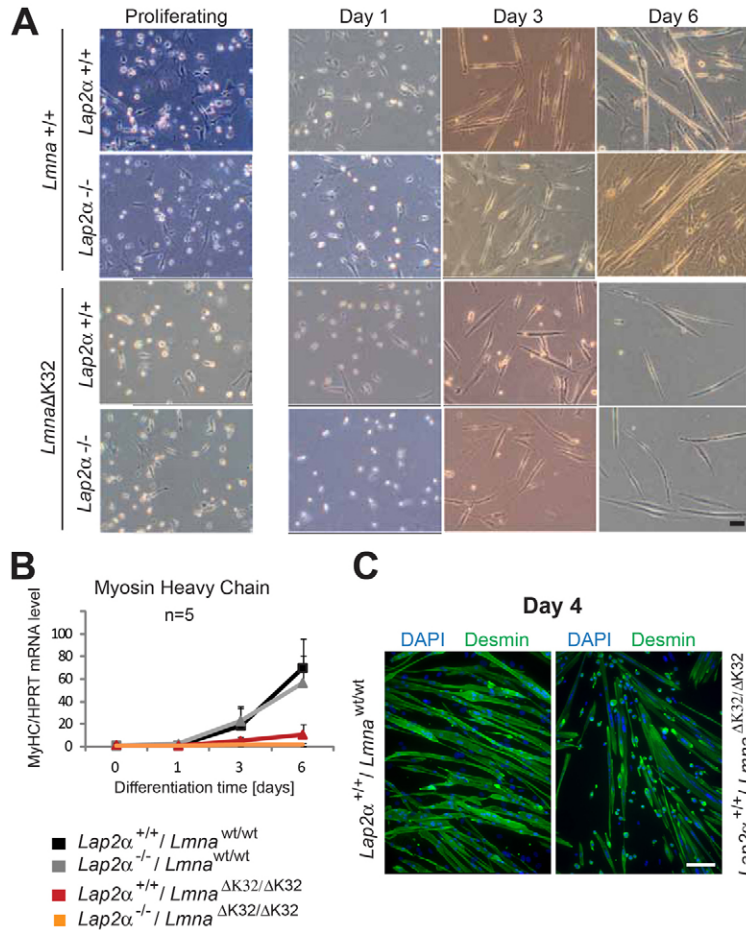

**Fig. 7. Primary *Lmna*<sup>ΔK32/ΔK32</sup> myoblasts exhibit delayed and insufficient *in vitro* differentiation irrespective of presence or absence of LAP2 $\alpha$ .** Primary murine myoblasts were isolated from newborn littermates and expanded and differentiated on collagen-coated dishes. At 1, 3 and 6 days after induction of differentiation, cultures were analyzed. **(A)** Brightfield images in the left column show proliferating myoblasts, those in other columns show myoblasts that have been plated at the same densities and induced to differentiate for 1, 3 and 6 days. A lag of *Lmna*<sup>ΔK32/ΔK32</sup> myoblast differentiation irrespective of LAP2 $\alpha$  at day 3 and massive reduction of myotube formation at day 6 of *in vitro* muscle differentiation is detectable. Scale bar: 100  $\mu$ m. **(B)** Real-time PCR analyses of myosin heavy chain (MyHC) normalized to endogenous levels of *Hprt* showing an absence of myosin heavy chain upregulation upon *Lmna*<sup>ΔK32/ΔK32</sup> myoblast differentiation. Means of five independent experiments are shown and only positive standard errors are shown as error bars. **(C)** Confocal immunofluorescence microscopic analyses of differentiating myoblasts at day 4 of differentiation, stained with antibodies to desmin. Fusion of *Lmna*<sup>ΔK32/ΔK32</sup> myoblasts is impaired. DNA was stained with DAPI. Scale bar: 50  $\mu$ m.

pathologies. In contrast, the nucleoplasmic  $\Delta$ K32 lamin A/C is still able to bind LAP2 $\alpha$  and function in the regulation of tissue progenitor cells.

## Materials and Methods

### Mice

Mice were maintained in accordance with the procedures outlined in the Guide for the Care and Use of Laboratory Animals. Animal experiments were performed according to permissions from Austrian authorities. Data was obtained by observers who did not know the genotype of the animals. *Lap2α*-deficient mice were generated by deleting *Lap2α*-specific exon 4 in the *Lap2* gene (also known as thymopoietin, *Tmpo*) using the Cre/loxP system (Naetar et al., 2008). *Lmna*<sup>ΔK32/ΔK32</sup> mice were generated by a knock-in strategy replacing the wild-type *Lmna* exon 1 with an exon 1 where the lysine at position 32 (delAAG) is deleted (Bertrand et al., 2012). In order to obtain double mutants and littermate controls, mice heterozygous for both *Lap2α* and *Lmna*  $\Delta$ K32 (*Lap2α*<sup>+/-</sup>, *Lmna*<sup>+/-ΔK32</sup>) were crossed. All experiments were performed in a mixed genetic background (C57BL/6, B6129F1, BALB/c) on postnatal day 15–18. Animals were killed by cervical dislocation. For genotyping, genomic DNA was prepared from tail tips and PCR analyses were performed using puRETag Ready-To-Go PCR beads (GE Healthcare Biosciences, NJ, USA) in a PTC-200 Peltier Thermo Cycler (TJ Research). The used primers were:

*Lap2α*: Exon 4: 5'-CACAAATCCCTAGAGGACTTCACTT-3', Intron 4: 5'-CTGTGACTTTTGTGGCCTTCCAGTCTA-3' and Exon 3: 5'-CAGGGAAGTGAATCGAGATCCTCTAC-3'; *Lmna*: intron 2 forward: 5'-CAAAGTGCCTGAGGAGTTCA-3' and intron 2 reverse: 5'-TGACAGCATAGGCCCTGTAC-3'.

### Tissue sections, histology, immunohistochemistry and immunofluorescence

Following isolation, organs were immediately dipped into pre-chilled 2-methylbutane and snap frozen in liquid nitrogen, embedded in TBS<sup>TM</sup> tissue freezing medium (Triangle Biomedical Sciences, Durham, NC, USA), and 5  $\mu$ m sections were cut using a Cryostat HM500 OM at  $-23^{\circ}$ C. Alternatively, tissues were fixed

in 4% formaldehyde (Rotifix from Roth, Karlsruhe, Germany), dehydrated, cleared, embedded in paraffin and sectioned using a Leica RM 2155 microtome. Hematoxylin and Eosin staining was done according to standard protocol using an automated Ass-1 staining unit. Immunostainings for embryonic myosin heavy chain were performed using mouse monoclonal antibody against embryonic myosin (F1.652; DSHB, University of Iowa, Iowa City, USA) and biotinylated anti-mouse antibody. Stains were developed using DAB (Vector Laboratories, Burlingame, CA, USA), and nuclei were counterstained with Hematoxylin. The sections were dehydrated, mounted in Entellan (Merck, Darmstadt, Germany), and analyzed using a Zeiss Axio Imager.M1 microscope equipped with a Zeiss AxioCam MRc5 and images processed by AxioVision Rel. 4.5 software.

For immunofluorescence microscopy, cryosections were fixed either in 3.7% formaldehyde (Merck, Darmstadt, Germany) in PBS or in ice-cold acetone. Paraffin sections were incubated in xylene for 20 minutes, isopropanol for 10 minutes, 96%, 80%, 70% and 60% ethanol for 2 minutes each, and in double distilled water for 5 minutes. Rehydrated sections were incubated for 60 minutes in citrate buffer (1.8 mM citric acid and 8.2 mM sodium citrate) at  $100^{\circ}$ C. After washing in PBS, sections were incubated in 0.1% Triton X-100/PBS for 30 minutes, blocked with goat serum (Vectastain; Vector Labs, Burlingame, CA, USA), and incubated with antibodies and Hoechst dye as described previously (Naetar et al., 2007). Samples were viewed in a Zeiss Axiovert 200 M microscope equipped with a Zeiss LSM510META confocal laser-scanning unit, an alpha Plan-Fluor 100 $\times$ /1.45 oil and a Plan-Apochromat 63 $\times$ /1.40 oil DIC MC27 objectives (Zeiss). Images were prepared with Adobe Photoshop software.

The following antibodies were used: goat polyclonal anti-lamin A/C antibody N18 (Santa Cruz Biotechnology Inc., Heidelberg, Germany), rabbit antiserum to LAP2 $\alpha$  (Vlcek et al., 2002), mouse monoclonal antibody to LAP2 $\alpha$  (15/2) (Dechat et al., 1998), rabbit serum NCL-KI67p (Novocastra Lab., New Castle UK) and rabbit antiserum to desmin (ab8592; Abcam, Cambridge, UK). DNA was stained with DAPI (#32670, Sigma, St Louis, MO, USA).

### Isolation and analyses of primary cells

Primary fibroblasts were isolated 1–3 days after birth from back skin of newborn mice as described previously (Andr  et al., 1998). Cells were cultivated in high glucose DMEM, 10% fetal calf serum (FCS), 50 U/ml penicillin, 50  $\mu$ g/ml



streptomycin and 0.2 μM L-glutamine (all from Invitrogen, Carlsbad, CA, USA) at 37°C and 5% CO<sub>2</sub>. Experiments were performed between passage 1 and 4. For immunofluorescence, cells were seeded on coverslips and processed as previously described using the following antibodies: goat polyclonal anti-lamin A/C antibody N18 (Santa Cruz), mouse monoclonal anti-lamin A/C antibody, clone 4C11, provided by E. Ogris (Roblek et al., 2010), rabbit antiserum to LAP2α (Vlcek et al., 2002), goat polyclonal anti-lamin B antibody (C20, Santa Cruz).

Fluorescence intensity measurements were made using the profile tool in Zeiss LSM Image Browser software, version 4.2.0.121. Ratios of nucleoplasmic to peripheral mean A-type lamin fluorescence intensities were calculated for 25 or 30 fibroblasts of each genotype.

Primary myoblasts were obtained from de-skinned front and hind limbs of neonatal mice (2-days old) as described previously (Gotic et al., 2010). To induce muscle differentiation, proliferation medium (20% FCS/2.5 ng/ml basic FGF/Ham's F-10/penicillin and streptomycin) was replaced with DMEM containing 5% horse serum and penicillin and streptomycin. All cells were kept on collagen-coated dishes in a humidified atmosphere at 37°C and 5% CO<sub>2</sub>.

#### Isolation of myofiber-associated satellite cells

Mice were killed and single fibers from particular muscles (tibialis anterior extensor, digitorum longus, soleus, gastrocnemius, quadriceps, triceps and biceps brachii) were isolated according to the method of Shefer and Yablonka-Reuveni and modified as described in Gotic et al. (Shefer and Yablonka-Reuveni, 2005; Gotic et al., 2010). In brief, muscles were collected in PBS and subsequently incubated in sterile 0.2% collagenase I (Gibco Life Technologies, Carlsbad, CA, USA)/DMEM solution (3 ml/50 mg of tissue) for 1.5–2 hours in a shaking water bath at 37°C. Muscle digestion was stopped by transferring samples to a series of DMEM-containing Petri dishes coated with filtered horse serum. Single fibers were released by gentle trituration, collected in DMEM and pelleted by centrifugation at 17 g for 5 minutes. After washing twice in PBS, fibers were resuspended in 0.01% collagenase II (Gibco Life Technologies)/0.15 U/ml dispase II (Roche Applied Science, Mannheim, Germany)/PBS and incubated for 30 minutes at 37°C with shaking. Samples were filtered through 40 μm pore cell strainers and cells were pelleted by 5 minutes centrifugation at 210 g. After two washes in PBS, samples were stained on ice for 30 minutes in 2% FCS/PBS containing the following antibody cocktail: anti-CD45, APC-conjugated anti-mouse CD45 (Ly-5); anti-Sca1, PerCP–Cy5.5-conjugated anti-mouse Sca-1 (Ly-6A/E); anti-Mac1, APC-conjugated anti-mouse CD11b; and anti-β1-integrin, PE anti-mouse/rat CD29 (all from eBioscience, Frankfurt, Germany; and anti-CXCR4, FITC rat anti-mouse CD184 (CXCR4) (BD Pharmingen™ Heidelberg, Germany).

Cells were washed and analyzed using a FASCAria equipped with DIVA acquisition software (BD Biosciences) as described previously (Cerletti et al., 2008). In brief, viable cells were first analyzed on the basis of size and granulation. Subsequently, a population of cells homogenous in size was tested for the expression of CD45, Mac1 and Sca1 surface markers and a subpopulation of CD45<sup>–</sup>/Sca1<sup>–</sup>/Mac1<sup>–</sup> cells was selected for CXCR4 and β1-integrin expression analysis. The number of CD45<sup>–</sup> Sca1<sup>–</sup> Mac1<sup>–</sup> CXCR4<sup>+</sup> β1-integrin<sup>+</sup> cells in each mouse sample was presented as percentage within the parent CD45<sup>–</sup> Sca1<sup>–</sup> Mac1<sup>–</sup> population.

#### Immunoblot analyses

Cells and tissues were lysed and analyzed by SDS-PAGE and immunoblotting as previously described (Naetar et al., 2008) using the following antibodies: antiserum to LAP2α (Vlcek et al., 2002), goat polyclonal anti-lamin A/C serum N18 (Santa Cruz), anti-lamin B (C-20, Santa Cruz), anti-emerin (NCL-Emerin, Novocastra), rabbit polyclonal actin antiserum A-2066 (Sigma), anti-γ-tubulin (B-5-1-2, Sigma) and rabbit polyclonal antiserum to histone 3, (Abcam, Cambridge, MA, USA). Quantification of protein levels was performed with LICOR Odyssey Infrared Imaging System, application software version 2.1.12. Band intensities of lamins A and C were combined and normalized to the band intensity of actin or γ-tubulin or histone 3 as loading control.

#### Quantitative real-time PCR

Total RNA was isolated from muscle tissue and cultured cells using TRIzol® reagent (Invitrogen, Carlsbad, CA, USA) or RNeasy® Plus Micro Kit (Qiagen, Hilden, Germany). cDNA was synthesized by First Strand cDNA Synthesis Kit for RT-PCR (Roche Applied Science, Mannheim, Germany) according to manufacturer's instructions and specific sequences were subsequently amplified on an Mastercycler® ep realplex (Eppendorf, Hamburg, Germany) using MESA GREEN qPCR MasterMix Plus for SYBR Assay I TTP (Eurogentec, Liege, Belgium) for quantitative PCR. Specific primers are listed in supplementary material Table S1 (see also Gotic et al., 2010; Ozawa et al., 2006; Usami et al., 2003). Data were documented using Mastercycler® ep realplex software (Eppendorf, Hamburg, Germany) and processed using Microsoft Excel XP. Endogenous levels of Hprt (hypoxanthine-guanine phosphoribosyltransferase) in quantitative PCR were used for data normalization according to the Pfaffl method (Pfaffl, 2001).

#### In vitro binding assay and immunoprecipitation

The ΔK32 mutation was introduced into prelamin A cDNA, in the pET24-LA construct (Goldman et al., 2004) by *in vitro* mutagenesis using a QuikChange™ Site-Directed Mutagenesis Kit (Stratagene, La Jolla, CA, USA), using the following primers: forward: 5'-AGGAGGAGGACCTGCAGGAGCTCAATG-3', reverse: 5'-AGGTCCTCCTCCTGCAGCCGGTGA-3'. The construct was sequenced before use. Wild-type and ΔK32 prelamin A were expressed in bacteria as described previously (Dechat et al., 2000) and resolved using 10% SDS-PAGE and transferred to a nitrocellulose membrane. Purified rat vimentin was used as a negative control (Foisner et al., 1988). Nitrocellulose membranes were stained with PonceauS, washed in PBST (PBS, 0.05% Tween 20) and incubated in overlay buffer (10 mM Hepes, pH 7.4, 100 mM NaCl, 5 mM MgCl<sub>2</sub>, 2 mM EGTA, 0.1% Triton X-100, 1 mM DTT) for 1 hour with three changes. After blocking with 2% BSA in overlay buffer, membranes were probed overnight at 4°C with *in vitro*-translated, radioactively labeled FLAG-tagged LAP2α, diluted 1:50 in overlay buffer plus 1% BSA (w/v) and 1 mM PMSF. For this, a plasmid containing FLAG-tagged LAP2α cDNA (pSV5) (Vlcek et al., 1999) was *in vitro* translated using the TnT® T7 Quick Coupled Transcription/Translation System (Promega, Mannheim, Germany) according to the manufacturer's instructions using <sup>35</sup>S-labelled methionine (Hartmann Analytic, Braunschweig, Germany). After extensive washing in overlay buffer, nitrocellulose was air dried, and bound proteins were detected by autoradiography.

For solubility assays, 1×10<sup>7</sup> mutant or wild-type fibroblasts were lysed by sonication in 3 ml lysis buffer (20 mM Hepes, pH 7.4, 78 mM KCl, 42 mM NaCl, 10 mM EGTA, 8.4 mM CaCl<sub>2</sub>, 4 mM MgCl<sub>2</sub>, 1 mM DTT) supplemented with protease inhibitor cocktail (Roche Diagnostics, Mannheim, Germany). Following addition of 0.5% Triton X-100 and 0.1% SDS, soluble fractions were obtained by centrifugation at 1700 g for 10 minutes. Total cell lysates and soluble fractions were used for immunoblotting and protein amounts were quantified by ImageJ.

Immunoprecipitation of ΔK32 lamin A/C was done from soluble cell fractions (see above) as described previously (Dechat et al., 2000) using mouse monoclonal 3A6-4C11 anti-lamin A/C antibody (Active Motif, Carlsbad, CA) and protein-A-Sepharose beads (Sigma).

#### Statistical analysis

Data are presented as the mean of *n* individual experiments (*n* being indicated in each figure), the error bars denote standard errors. Log-Rank tests for survival curves, Chi-squared test, Student's *t*-test and one-way ANOVA were applied using Microsoft Excel HP. Statistical significance was assumed at a *P*-value <0.05, and is indicated on graphs using an asterisk (\*\*\*) indicates *P*<0.01).

#### Acknowledgements

We thank Thomas Sauer, MFPL, Vienna, for valuable help in FACS analysis of SMPs. The monoclonal antibody F1.652, developed by Helen Blau, was obtained from the Developmental Studies Hybridoma Bank developed under the auspices of the NICHD and maintained by The University of Iowa, Department of Biology, Iowa City, IA 52242. We thank Bob Goldman, Northwestern University Chicago, for the generous gift of lamin A plasmids and Egon Ogris, Medical University Vienna, for anti-lamin A/C monoclonal antibody.

#### Author contributions

U.P. planned, coordinated, and performed experiments and prepared the manuscript and figures. T.D. and A.T.B. performed experiments, provided figures and corrected the manuscript. N.W., R.S. and K.B. performed histology analyses. I.G. provided scientific and technical advice and tools. G.B. provided scientific advice and corrected the manuscript. R.F. planned and supervised the project and wrote the manuscript.

#### Funding

This work was supported by the Austrian Science Research Fund [grant number FWF P22043-B12 to R.F.]; the European Union Sixth Framework Programmes [Euro-laminopathies #018690 to R.F. and G.B.]; and European Cooperation in Science and Technology Action (Nanonet) [grant number BM1002 to R.F. and G.B.].

Supplementary material available online at

<http://jcs.biologists.org/lookup/suppl/doi:10.1242/jcs.115246/-/DC1>

## References

- Andrá, K., Nikolic, B., Stöcher, M., Drenckhahn, D. and Wiche, G. (1998). Not just scaffold: plectin regulates actin dynamics in cultured cells. *Genes Dev.* **12**, 3442-3451.
- Andrés, V. and González, J. M. (2009). Role of A-type lamins in signaling, transcription, and chromatin organization. *J. Cell Biol.* **187**, 945-957.
- Bank, E. M., Ben-Harush, K., Wiesel-Motiuk, N., Barkan, R., Feinstein, N., Lotan, O., Medalia, O. and Gruenbaum, Y. (2011). A laminopathic mutation disrupting lamin filament assembly causes disease-like phenotypes in *Caenorhabditis elegans*. *Mol. Biol. Cell* **22**, 2716-2728.
- Bertrand, A. T., Renou, L., Papadopoulos, A., Beuvin, M., Lacène, E., Massart, C., Ottolenghi, C., Decostre, V., Maron, S., Schlossarek, S. et al. (2012). DelK32-lamin A/C has abnormal location and induces incomplete tissue maturation and severe metabolic defects leading to premature death. *Hum. Mol. Genet.* **21**, 1037-1048.
- Cerletti, M., Jurga, S., Witzak, C. A., Hirshman, M. F., Shadrach, J. L., Goodyear, L. J. and Wagers, A. J. (2008). Highly efficient, functional engraftment of skeletal muscle stem cells in dystrophic muscles. *Cell* **134**, 37-47.
- Dechat, T., Gotzmann, J., Stockinger, A., Harris, C. A., Talle, M. A., Siekierka, J. J. and Foisner, R. (1998). Detergent-salt resistance of LAP2alpha in interphase nuclei and phosphorylation-dependent association with chromosomes early in nuclear assembly implies functions in nuclear structure dynamics. *EMBO J.* **17**, 4887-4902.
- Dechat, T., Korbei, B., Vaughan, O. A., Vlcek, S., Hutchison, C. J. and Foisner, R. (2000). Lamina-associated polypeptide 2alpha binds intranuclear A-type lamins. *J. Cell Sci.* **113**, 3473-3484.
- Dechat, T., Pflieger, K., Sengupta, K., Shimi, T., Shumaker, D. K., Solimando, L. and Goldman, R. D. (2008). Nuclear lamins: major factors in the structural organization and function of the nucleus and chromatin. *Genes Dev.* **22**, 832-853.
- Dechat, T., Gesson, K. and Foisner, R. (2010). Lamina-independent lamins in the nuclear interior serve important functions. *Cold Spring Harb. Symp. Quant. Biol.* **75**, 533-543.
- Dorner, D., Vlcek, S., Foeger, N., Gajewski, A., Makolm, C., Gotzmann, J., Hutchison, C. J. and Foisner, R. (2006). Lamina-associated polypeptide 2alpha regulates cell cycle progression and differentiation via the retinoblastoma-E2F pathway. *J. Cell Biol.* **173**, 83-93.
- Foisner, R. and Gerace, L. (1993). Integral membrane proteins of the nuclear envelope interact with lamins and chromosomes, and binding is modulated by mitotic phosphorylation. *Cell* **73**, 1267-1279.
- Foisner, R., Leichtfried, F. E., Herrmann, H., Small, J. V., Lawson, D. and Wiche, G. (1988). Cytoskeleton-associated plectin: in situ localization, in vitro reconstitution, and binding to immobilized intermediate filament proteins. *J. Cell Biol.* **106**, 723-733.
- Goldman, R. D., Shumaker, D. K., Erdos, M. R., Eriksson, M., Goldman, A. E., Gordon, L. B., Gruenbaum, Y., Khuon, S., Mendez, M., Varga, R. et al. (2004). Accumulation of mutant lamin A causes progressive changes in nuclear architecture in Hutchinson-Gilford progeria syndrome. *Proc. Natl. Acad. Sci. USA* **101**, 8963-8968.
- Gotic, I., Schmidt, W. M., Biadasiewicz, K., Leschnik, M., Spilka, R., Braun, J., Stewart, C. L. and Foisner, R. (2010). Loss of LAP2 alpha delays satellite cell differentiation and affects postnatal fiber-type determination. *Stem Cells* **28**, 480-488.
- Gotzmann, J. and Foisner, R. (2006). A-type lamin complexes and regenerative potential: a step towards understanding laminopathic diseases? *Histochem. Cell Biol.* **125**, 33-41.
- Guelen, L., Pagie, L., Brassat, E., Meuleman, W., Faza, M. B., Talhout, W., Eussen, B. H., de Klein, A., Wessels, L., de Laat, W. et al. (2008). Domain organization of human chromosomes revealed by mapping of nuclear lamina interactions. *Nature* **453**, 948-951.
- Heessen, S. and Fornerod, M. (2007). The inner nuclear envelope as a transcription factor resting place. *EMBO Rep.* **8**, 914-919.
- Lamperti, C. and Moggio, M. (2010). Muscular dystrophies: histology, immunohistochemistry, molecular genetics and management. *Curr. Pharm. Des.* **16**, 978-987.
- Markiewicz, E., Dechat, T., Foisner, R., Quinlan, R. A. and Hutchison, C. J. (2002). Lamina A/C binding protein LAP2alpha is required for nuclear anchorage of retinoblastoma protein. *Mol. Biol. Cell* **13**, 4401-4413.
- Markiewicz, E., Ledran, M. and Hutchison, C. J. (2005). Remodelling of the nuclear lamina and nucleoskeleton is required for skeletal muscle differentiation in vitro. *J. Cell Sci.* **118**, 409-420.
- Moir, R. D., Yoon, M., Khuon, S. and Goldman, R. D. (2000). Nuclear lamins A and B1: different pathways of assembly during nuclear envelope formation in living cells. *J. Cell Biol.* **151**, 1155-1168.
- Naetar, N., Hutter, S., Dorner, D., Dechat, T., Korbei, B., Gotzmann, J., Beug, H. and Foisner, R. (2007). LAP2alpha-binding protein LINT-25 is a novel chromatin-associated protein involved in cell cycle exit. *J. Cell Sci.* **120**, 737-747.
- Naetar, N., Korbei, B., Kozlov, S., Kerényi, M. A., Dorner, D., Kral, R., Gotic, I., Fuchs, P., Cohen, T. V., Bittner, R. et al. (2008). Loss of nucleoplasmic LAP2alpha-lamin A complexes causes erythroid and epidermal progenitor hyperproliferation. *Nat. Cell Biol.* **10**, 1341-1348.
- Ozawa, R., Hayashi, Y. K., Ogawa, M., Kurokawa, R., Matsumoto, H., Noguchi, S., Nonaka, I. and Nishino, I. (2006). Emerin-lacking mice show minimal motor and cardiac dysfunctions with nuclear-associated vacuoles. *Am. J. Pathol.* **168**, 907-917.
- Pekovic, V., Harborth, J., Broers, J. L., Ramaekers, F. C., van Engelen, B., Lammens, M., von Zglinicki, T., Foisner, R., Hutchison, C. and Markiewicz, E. (2007). Nucleoplasmic LAP2alpha-lamin A complexes are required to maintain a proliferative state in human fibroblasts. *J. Cell Biol.* **176**, 163-172.
- Pendás, A. M., Zhou, Z., Cadiñanos, J., Freije, J. M., Wang, J., Hultenby, K., Astudillo, A., Wernerson, A., Rodríguez, F., Tryggvason, K. et al. (2002). Defective prelamina A processing and muscular and adipocyte alterations in Zmpste24 metalloproteinase-deficient mice. *Nat. Genet.* **31**, 94-99.
- Pfaffl, M. W. (2001). A new mathematical model for relative quantification in real-time RT-PCR. *Nucleic Acids Res.* **29**, e45.
- Prokocimer, M., Davidovich, M., Nissim-Rafinia, M., Wiesel-Motiuk, N., Bar, D. Z., Barkan, R., Meshorer, E. and Gruenbaum, Y. (2009). Nuclear lamins: key regulators of nuclear structure and activities. *J. Cell. Mol. Med.* **13**, 1059-1085.
- Quijano-Roy, S., Mbieleu, B., Bönnemann, C. G., Jeannot, P. Y., Colomer, J., Clarke, N. F., Cuisset, J. M., Roper, H., De Meirleir, L., D'Amico, A. et al. (2008). De novo LMNA mutations cause a new form of congenital muscular dystrophy. *Ann. Neurol.* **64**, 177-186.
- Röber, R. A., Weber, K. and Osborn, M. (1989). Differential timing of nuclear lamin A/C expression in the various organs of the mouse embryo and the young animal: a developmental study. *Development* **105**, 365-378.
- Roblek, M., Schüchner, S., Huber, V., Ollram, K., Vlcek-Vesely, S., Foisner, R., Wehnert, M. and Ogris, E. (2010). Monoclonal antibodies specific for disease-associated point-mutants: lamin A/C R453W and R482W. *PLoS ONE* **5**, e10604.
- Rusiñol, A. E. and Sinensky, M. S. (2006). Farnesylated lamins, progeroid syndromes and farnesyl transferase inhibitors. *J. Cell Sci.* **119**, 3265-3272.
- Shefer, G. and Yablonka-Reuveni, Z. (2005). Isolation and culture of skeletal muscle myofibers as a means to analyze satellite cells. *Methods Mol. Biol.* **290**, 281-304.
- Stewart, C. and Burke, B. (1987). Teratocarcinoma stem cells and early mouse embryos contain only a single major lamin polypeptide closely resembling lamin B. *Cell* **51**, 383-392.
- Sullivan, T., Escalante-Alcalde, D., Bhatt, H., Anver, M., Bhat, N., Nagashima, K., Stewart, C. L. and Burke, B. (1999). Loss of A-type lamin expression compromises nuclear envelope integrity leading to muscular dystrophy. *J. Cell Biol.* **147**, 913-920.
- Usami, A., Abe, S. and Ide, Y. (2003). Myosin heavy chain isoforms of the murine masseter muscle during pre- and post-natal development. *Anat. Histol. Embryol.* **32**, 244-248.
- Vlcek, S., Just, H., Dechat, T. and Foisner, R. (1999). Functional diversity of LAP2alpha and LAP2beta in postmitotic chromosome association is caused by an alpha-specific nuclear targeting domain. *EMBO J.* **18**, 6370-6384.
- Vlcek, S., Korbei, B. and Foisner, R. (2002). Distinct functions of the unique C terminus of LAP2alpha in cell proliferation and nuclear assembly. *J. Biol. Chem.* **277**, 18898-18907.
- Wilson, K. L. and Foisner, R. (2010). Lamina-binding proteins. *Cold Spring Harb. Perspect. Biol.* **2**, a000554.
- Worman, H. J. and Bonne, G. (2007). 'Laminopathies': a wide spectrum of human diseases. *Exp. Cell Res.* **313**, 2121-2133.
